# Supplementary material
Source: PubMed Central journal article supplement (PMC5257287)
Supplement: NIHMS832510-supplement-Supp_info.pdf [file NIHMS832510-supplement-Supp_info.pdf]

## Constitutive Regulation of the Glutamate/Aspartate Transporter EAAT1 by Calcium/Calmodulin-Dependent Protein Kinase II

Aarti R Chawla, Derrick E Johnson, Agnes Zybura, Benjamin P Leeds, Ross M Nelson, Andy Hudmon

### Supplementary figure 1: CaMKII signaling regulates glutamate uptake in rodent cultured cortical astrocytes predominantly expressing EAAT1.

(A) Average [ $^3\text{H}$ ]-glutamate uptake following CaMKII inhibition by tat-CN21 in cultured cortical astrocytes ( $n=3$ ,  $\pm$  S.D.) normalized to untreated control. Tat-CN21 (10  $\mu\text{M}$ ) and the non-active inhibitor tat-CN21 Ala (10  $\mu\text{M}$ ) were applied to cells for 20 minutes prior to a 20 minute [ $^3\text{H}$ ]-glutamate measurement protocol. (B) Average [ $^3\text{H}$ ]-glutamate uptake normalized to untreated control following inhibition of glutamate transporters in cultured cortical astrocytes ( $n=3$ ,  $\pm$  S.D.). Glutamate transport inhibitors TBOA (100  $\mu\text{M}$ ), UCPH-101 (10  $\mu\text{M}$ ) and DHK (10  $\mu\text{M}$ ) were applied to cells for 20 minutes prior to a 20 minute [ $^3\text{H}$ ]-glutamate uptake measurement protocol. The asterisk indicates significant difference compared to untreated control (\*,  $p\leq 0.05$ , one-way ANOVA, *post-hoc* Dunnett's test).

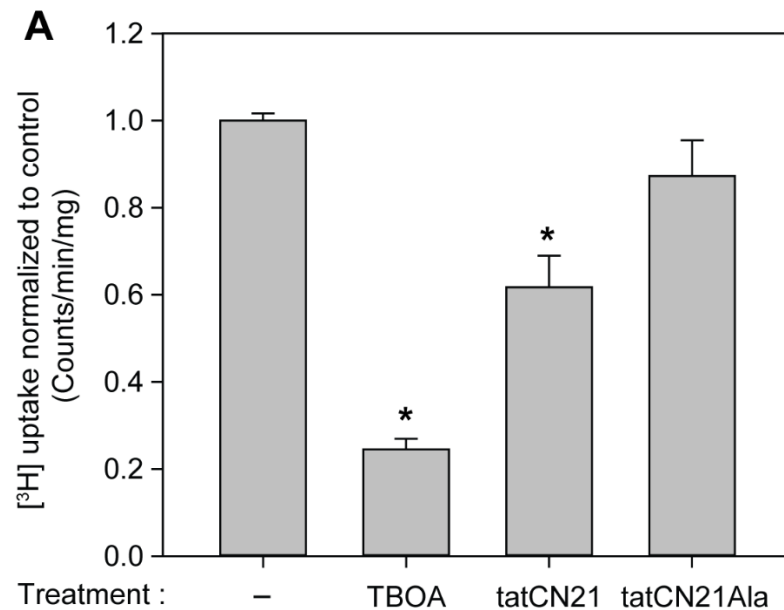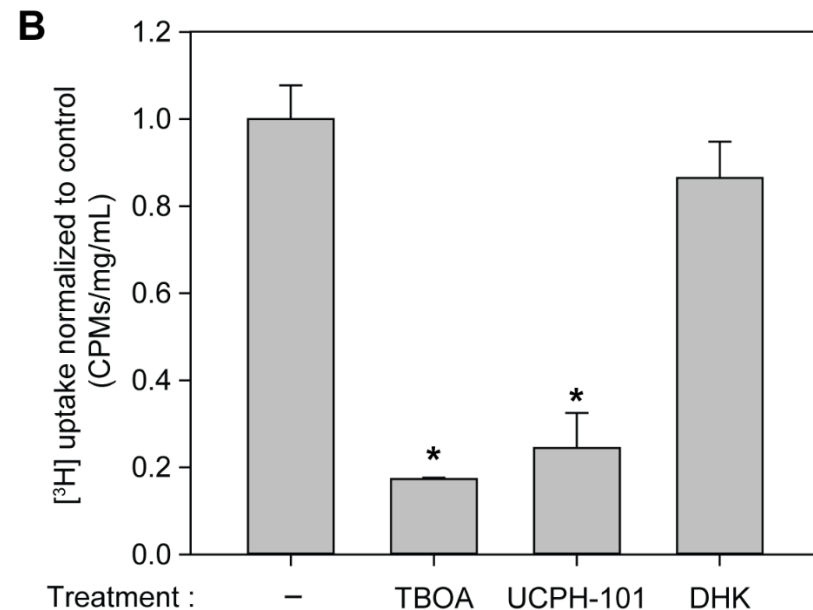

**Supplementary figure 2: CaMKII inhibition reduces EAAT1 but not EAAT2 mediated [<sup>3</sup>H]-glutamate uptake in A172 glioblastoma cells.** (A) Average [<sup>3</sup>H]-glutamate uptake in mCherry-EAAT1 (n=9, ± S.E.M) and (B) mCherry-EAAT2 transfected cells (n=6, ± S.D.) normalized to mCherry transfected untreated A172 glioblastoma cells. The CaMKII inhibitors KN-93 (5µM) and its inactive analog KN-92 (5µM) were applied to cells for 20 minutes prior to a 20 minute [<sup>3</sup>H]-glutamate uptake measurement protocol. The asterisk indicates significant difference compared to transfected untreated control (\*, p≤0.05, one-way ANOVA, *post-hoc* Dunnett's test).

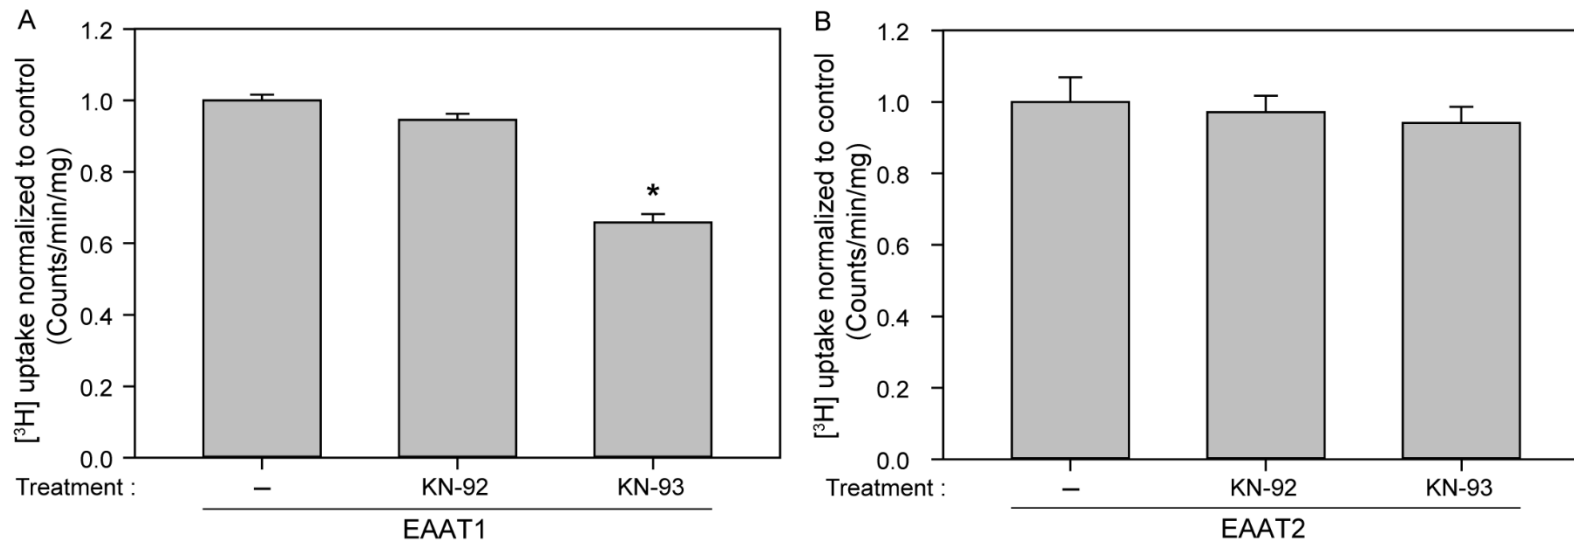

**Supplementary figure 3: Subcellular localization of transfected wild-type CaMKII HEK293T cells with EAAT1 or EAAT2.** Representative images of YFP wild-type  $\delta$ CaMKII in A, mCherry wild-type EAAT1 transfected and B, mCherry wild-type EAAT2 transfected HEK293T cells. Images are viewed using the red channel (excit. 595 nm/ emis. 620 nm) (left), green channel (excit. 490 nm/emis. 525 nm) (center) and merged (right). HEK293T cells were co-transfected with 6  $\mu$ g of  $\delta$ CaMKII cDNA and with 6  $\mu$ g of either EAAT1 or EAAT2 cDNA.

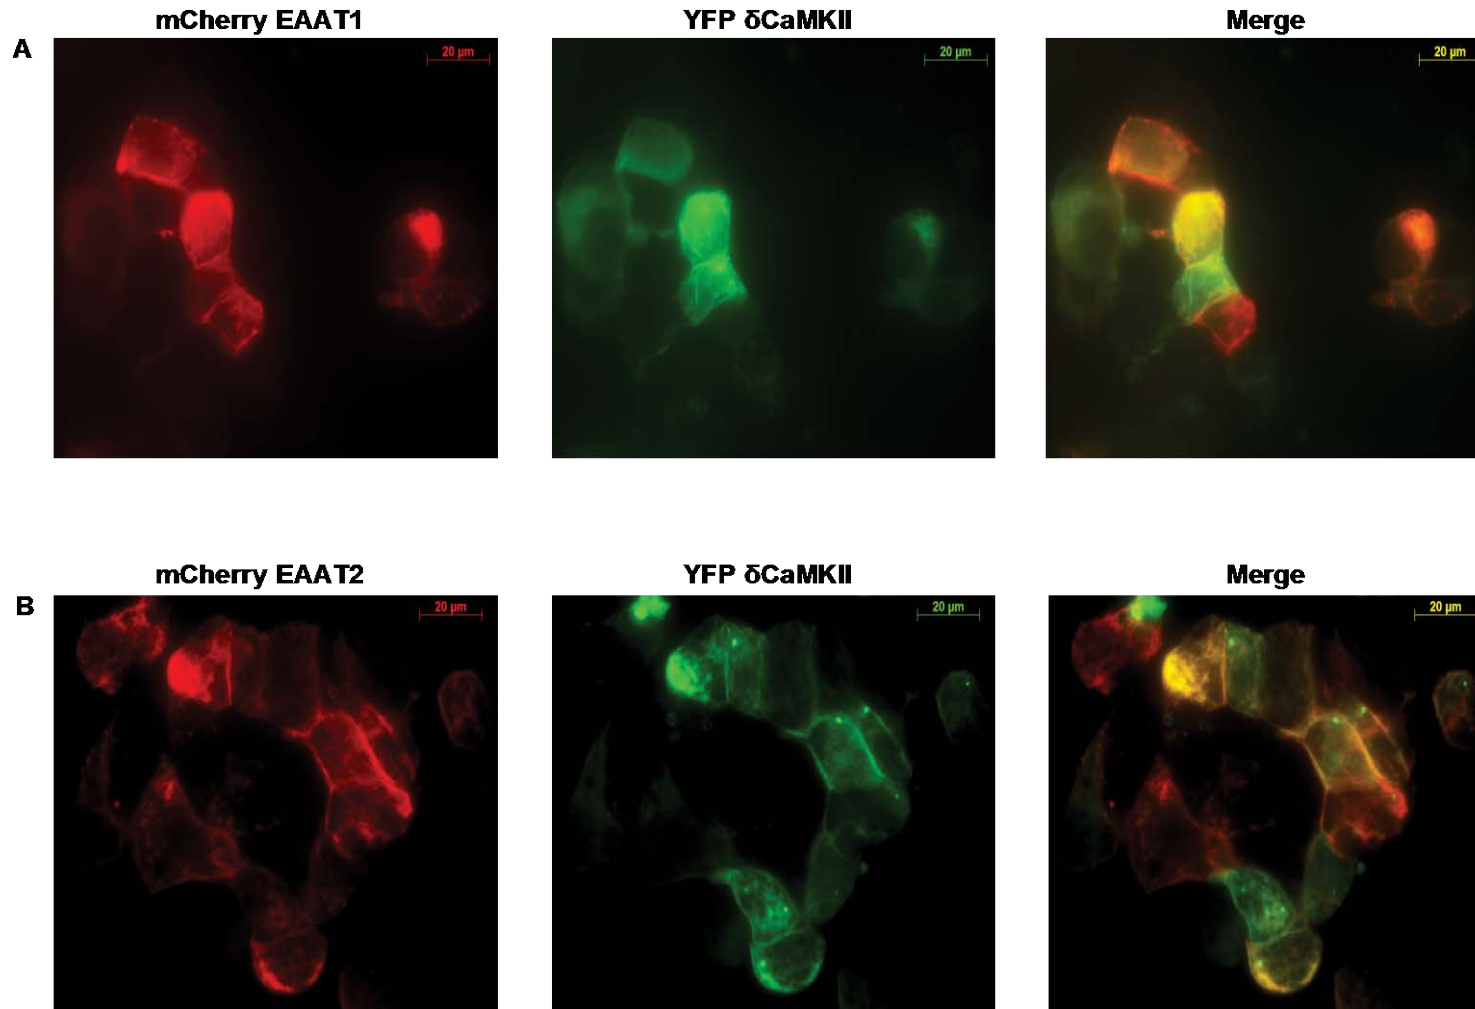

**Supplementary table 1: Primers used for site-directed mutagenesis.** Specific primer sequences resulting in a mutation are bolded and underlined.

| cDNA    | Mutation  | Primer Sequence (5' to 3')                                        |
|---------|-----------|-------------------------------------------------------------------|
| δCaMKII | Thr287Asp | atttctcaagcagtctac <u>cat</u> cctcctgtctgtgcatcatgg               |
| δCaMKII | Thr287Asp | ccatgatgcacagacaggaggatgta <u>gact</u> gcttgaagaaat               |
| δCaMKII | Asp136Asn | attctcaggcttcag <u>gtt</u> cctgtgaactatgccat                      |
| δCaMKII | Asp136Asn | atggcatagtacacagga <u>aac</u> ctgaagcctgagaat                     |
|         |           |                                                                   |
| EAAT1   | Thr26Ala  | ttcttgccaaaagt <u>gcg</u> cgtttacggactccc                         |
| EAAT1   | Thr26Ala  | gggagtccgtaaacgc <u>gca</u> ctttggccaagaa                         |
| EAAT1   | Thr26Asp  | cactttcttggccaaaag <u>gatc</u> gcggttacggactccctgctg              |
| EAAT1   | Thr26Asp  | cagcagggagtccgtaaacgc <u>gat</u> ctttggccaagaagaaagtg             |
| EAAT1   | Thr37Ala  | gtaactttaacatcctcctt <u>gca</u> aatgttctgcactttcttctgg            |
| EAAT1   | Thr37Ala  | ccaagaagaaagtgcagaacatt <u>gca</u> aaggaggatgttaaagttac           |
| EAAT1   | Thr37Asp  | cacactttggccaagaagaaagtgcagaacatt <u>gata</u> aaggaggatgttaaagtta |
| EAAT1   | Thr37Asp  | taactttaacatcctccttatcaatgttctgc <u>act</u> ttcttctggccaaaagtgtg  |

**Supplementary table 2: Antibodies tested for Western Blotting mCherry-EAAT1 and mCherry-EAAT2**

| <b>Primary antibody</b>  | <b>Company</b>           | <b>Catalog Number</b> | <b>Target</b>      | <b>Dilution</b> | <b>Detection</b> |
|--------------------------|--------------------------|-----------------------|--------------------|-----------------|------------------|
| Rabbit anti-EAAT1 (H-50) | Santa Cruz Biotechnology | sc-15316              | EAAT1 (N-terminus) | 1:500           | -                |
| Rabbit anti-EAAT1        | Abcam                    | ab416                 | EAAT1 (C-terminus) | 1:500           | +                |
| Rabbit anti-EAAT2 (H-85) | Santa Cruz Biotechnology | sc-15317              | EAAT2 (N-terminus) | 1:500-1:1000    | -                |
| Goat anti-EAAT2 (N-19)   | Santa Cruz Biotechnology | sc-7760               | EAAT2 (N-terminus) | 1:200           | -                |
| Rabbit anti-EAAT2        | Cell Signaling           | 3838                  | Human EAAT2        | 1:500-1:1000    | -                |
| Rabbit anti-EAAT2        | Abcam                    | 41621                 | EAAT2 (C-terminus) | 1:1000          | +                |
